# Supplementary material for: Ultrasensitive detection of β-lactamase-associated drug-resistant bacteria using a novel mass-tagged probe-mediated cascaded signal amplification strategy
Source: Royal Society of Chemistry journal article supplement (doi:10.1039/d2sc01530g), 2022-01-01
Supplement: d2sc01530g1.pdf [file d2sc01530g1.pdf]

This document certifies that the manuscript

## **Ultrasonic Detection of $\beta$ -Lactamase Associated Drug-Resistant Bacteria Using Novel Mass-Tagged Probe-Mediated Cascaded Signal Amplification Strategy**

prepared by the authors

**Jianhua Zhu, Yunfei Bai, Xiuyu Chen, Linlin Hu, Wenjun Zhang, Chunyan Liu, Hua Shao, Jianguo Sun, Yun Chen**

was edited for proper English language, grammar, punctuation, spelling, and overall style by one or more of the highly qualified native English speaking editors at AJE.

This certificate was issued on **June 29, 2022** and may be verified on the [AJE website](#) using the verification code **9E06-57C7-1944-EE2A-0416**.

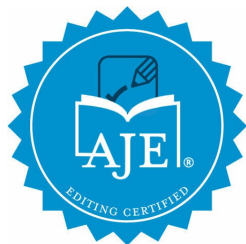

Neither the research content nor the authors' intentions were altered in any way during the editing process. Documents receiving this certification should be English-ready for publication; however, the author has the ability to accept or reject our suggestions and changes. To verify the final AJE edited version, please visit our verification page at [aje.com/certificate](#). If you have any questions or concerns about this edited document, please contact AJE at [support@aje.com](mailto:support@aje.com).
